# Supplementary material for: Defining species-specific and conserved interactions of apical membrane protein 1 during erythrocyte invasion in malaria to inform multi-species vaccines
Source: Springer Nature journal article supplement (doi:10.1007/s00018-023-04712-z), 2023-02-27
Supplement: MOESM1 [file 18_2023_4712_MOESM1_ESM.pdf]

## SUPPLEMENTARY MATERIAL

Drew DR, et al

*Defining species-specific and conserved interactions of apical membrane protein 1 during erythrocyte invasion in malaria to inform multi-species vaccines*

Full length Ron2 amino acid sequence identity matrix

|               | P.gallinace... | P.relictum | P.facilparum | P.reichenowi | P.coatneyi | P.knowlesi | P.vivax | P.cynomogi | P.ovale | P.malariae | P.berghei | P.yoelli | P.chabaudi | B.bovis | T.gondii |
|---------------|----------------|------------|--------------|--------------|------------|------------|---------|------------|---------|------------|-----------|----------|------------|---------|----------|
| P.gallinaceum |                |            |              |              |            |            |         |            |         |            |           |          |            |         |          |
| P.relictum    | 63.499%        |            |              |              |            |            |         |            |         |            |           |          |            |         |          |
| P.facilparum  | 42.416%        | 43.878%    |              |              |            |            |         |            |         |            |           |          |            |         |          |
| P.reichenowi  | 43.011%        | 44.321%    | 89.910%      |              |            |            |         |            |         |            |           |          |            |         |          |
| P.coatneyi    | 42.380%        | 43.036%    | 43.651%      | 44.220%      |            |            |         |            |         |            |           |          |            |         |          |
| P.knowlesi    | 42.373%        | 42.499%    | 43.896%      | 44.335%      | 85.390%    |            |         |            |         |            |           |          |            |         |          |
| P.vivax       | 41.190%        | 41.625%    | 43.356%      | 43.548%      | 81.946%    | 80.616%    |         |            |         |            |           |          |            |         |          |
| P.cynomogi    | 51.961%        | 46.987%    | 41.085%      | 41.632%      | 64.228%    | 63.989%    | 63.603% |            |         |            |           |          |            |         |          |
| P.ovale       | 44.482%        | 43.420%    | 45.269%      | 45.605%      | 59.026%    | 59.972%    | 58.669% | 53.285%    |         |            |           |          |            |         |          |
| P.malariae    | 37.614%        | 37.904%    | 40.112%      | 40.337%      | 49.550%    | 50.205%    | 50.123% | 43.837%    | 52.037% |            |           |          |            |         |          |
| P.berghei     | 36.460%        | 35.721%    | 36.708%      | 37.354%      | 39.140%    | 39.178%    | 38.667% | 38.144%    | 40.075% | 34.315%    |           |          |            |         |          |
| P.yoelli      | 35.600%        | 35.505%    | 36.583%      | 37.226%      | 39.279%    | 39.471%    | 38.530% | 37.715%    | 40.103% | 34.545%    | 80.753%   |          |            |         |          |
| P.chabaudi    | 36.929%        | 36.220%    | 36.168%      | 37.037%      | 37.977%    | 38.069%    | 37.159% | 37.339%    | 38.892% | 34.008%    | 69.407%   | 66.930%  |            |         |          |
| B.bovis       | 20.355%        | 20.708%    | 19.166%      | 19.083%      | 20.621%    | 20.555%    | 20.979% | 20.423%    | 20.662% | 19.562%    | 19.264%   | 19.321%  | 20.340%    |         |          |
| T.gondii      | 14.022%        | 14.642%    | 14.796%      | 14.899%      | 14.496%    | 14.687%    | 14.450% | 14.815%    | 14.139% | 13.892%    | 13.118%   | 13.359%  | 13.911%    | 13.002% |          |

Full length Ron2 amino acid sequence similarity matrix

|               | P.gallinace... | P.relictum | P.facilparum | P.reichenowi | P.coatneyi | P.knowlesi | P.vivax | P.cynomogi | P.ovale | P.malariae | P.berghei | P.yoelli | P.chabaudi | B.bovis | T.gondii |
|---------------|----------------|------------|--------------|--------------|------------|------------|---------|------------|---------|------------|-----------|----------|------------|---------|----------|
| P.gallinaceum |                |            |              |              |            |            |         |            |         |            |           |          |            |         |          |
| P.relictum    | 79.542%        |            |              |              |            |            |         |            |         |            |           |          |            |         |          |
| P.facilparum  | 61.918%        | 69.049%    |              |              |            |            |         |            |         |            |           |          |            |         |          |
| P.reichenowi  | 63.227%        | 70.468%    | 93.094%      |              |            |            |         |            |         |            |           |          |            |         |          |
| P.coatneyi    | 61.665%        | 67.734%    | 71.914%      | 72.849%      |            |            |         |            |         |            |           |          |            |         |          |
| P.knowlesi    | 61.864%        | 67.627%    | 71.617%      | 71.989%      | 94.991%    |            |         |            |         |            |           |          |            |         |          |
| P.vivax       | 59.863%        | 65.553%    | 70.492%      | 70.619%      | 91.765%    | 91.712%    |         |            |         |            |           |          |            |         |          |
| P.cynomogi    | 72.030%        | 67.413%    | 61.397%      | 62.588%      | 72.597%    | 72.501%    | 70.984% |            |         |            |           |          |            |         |          |
| P.ovale       | 63.795%        | 67.483%    | 70.484%      | 71.284%      | 81.002%    | 82.004%    | 80.074% | 69.586%    |         |            |           |          |            |         |          |
| P.malariae    | 54.267%        | 58.043%    | 63.477%      | 63.232%      | 69.951%    | 70.131%    | 70.867% | 58.982%    | 70.685% |            |           |          |            |         |          |
| P.berghei     | 59.307%        | 64.231%    | 65.053%      | 66.607%      | 66.712%    | 67.489%    | 65.733% | 60.933%    | 67.121% | 59.435%    |           |          |            |         |          |
| P.yoelli      | 58.357%        | 63.751%    | 65.130%      | 66.040%      | 67.108%    | 67.685%    | 66.013% | 60.325%    | 67.936% | 60.323%    | 90.051%   |          |            |         |          |
| P.chabaudi    | 60.512%        | 66.093%    | 64.145%      | 65.661%      | 65.379%    | 65.839%    | 63.421% | 60.386%    | 65.372% | 57.409%    | 85.707%   | 82.605%  |            |         |          |
| B.bovis       | 58.265%        | 57.698%    | 58.574%      | 58.328%      | 56.709%    | 57.105%    | 56.122% | 56.775%    | 56.887% | 57.361%    | 54.832%   | 54.961%  | 56.667%    |         |          |
| T.gondii      | 45.095%        | 45.634%    | 47.047%      | 46.975%      | 46.169%    | 46.360%    | 45.972% | 46.105%    | 46.385% | 46.159%    | 44.233%   | 44.802%  | 45.538%    | 43.363% |          |

**Figure S1:** Ron2 protein amino acid sequence identity matrix and similarity matrix

## Ron2 peptide amino acid sequence alignment

|                   | 1 | 10 | 20 | 30 | 40 |   |   |   |   |   |   |   |   |   |   |   |   |   |   |   |   |   |   |   |   |   |   |   |   |   |   |   |   |   |   |   |   |   |   |   |   |   |
|-------------------|---|----|----|----|----|---|---|---|---|---|---|---|---|---|---|---|---|---|---|---|---|---|---|---|---|---|---|---|---|---|---|---|---|---|---|---|---|---|---|---|---|---|
| Consensus         | D | T  | Q  | H  | A  | T | D | G | M | G | P | T | S | C | Y | T | S | T | I | P | P | P | K | Q | I | C | Q | Q | A | V | K | A | T | L | T | S |   |   |   |   |   |   |
| 1. P.ovale        | D | G  | Q  | H  | A  | T | D | G | M | G | P | A | T | S | C | Y | T | S | T | I | P | P | P | K | Q | V | C | R | Q | A | V | K | A | A | L | T |   |   |   |   |   |   |
| 2. P.vivax        | D | S  | Q  | H  | A  | T | D | G | M | G | P | A | T | S | C | Y | T | S | T | I | P | P | P | K | Q | V | C | R | Q | A | V | K | A | A | L | T |   |   |   |   |   |   |
| 3. P.malariae     | D | T  | Q  | H  | A  | T | D | G | V | G | P | A | T | S | C | Y | T | S | T | I | P | P | P | K | Q | V | C | Q | Q | V | K | A | T | L | T |   |   |   |   |   |   |   |
| 4. P.coatneyi     | D | T  | Q  | H  | A  | T | D | G | M | G | P | V | T | S | C | Y | T | S | T | I | P | P | P | K | Q | V | C | Q | Q | A | V | K | A | T | L | T |   |   |   |   |   |   |
| 5. P.cynomogi     | D | T  | Q  | H  | A  | T | D | G | M | G | P | V | T | S | C | Y | T | S | T | I | P | P | P | K | Q | V | C | Q | Q | A | V | K | A | T | L | T |   |   |   |   |   |   |
| 6. P.knowlesi     | D | T  | Q  | H  | A  | S | D | G | M | G | P | V | T | S | C | Y | T | S | T | I | P | P | P | K | Q | V | C | Q | Q | A | V | K | V | T | L | T |   |   |   |   |   |   |
| 7. P.berghei      | D | T  | Q  | H  | A  | T | D | G | M | G | P | S | T | S | C | Y | T | S | V | P | P | P | K | S | C | Q | Q | T | V | K | A | V | L | T | T |   |   |   |   |   |   |   |
| 8. P.chabaudi     | D | T  | Q  | H  | A  | T | D | G | M | G | P | S | T | S | C | Y | T | S | L | V | P | P | P | K | S | C | Q | Q | T | V | K | A | V | L | T |   |   |   |   |   |   |   |
| 9. P.yoelii       | D | T  | Q  | H  | A  | T | D | G | M | G | P | S | T | S | C | Y | T | S | L | P | P | P | K | S | C | Q | Q | T | V | K | T | V | L | T | T |   |   |   |   |   |   |   |
| 10. P.gallinaceum | D | T  | Q  | H  | A  | E | D | G | M | G | P | A | A | S | C | Y | T | S | T | I | P | P | P | K | Q | I | C | Q | S | A | V | K | T | L | T |   |   |   |   |   |   |   |
| 11. P.relictum    | D | A  | Q  | H  | A  | N | D | G | M | G | P | T | S | C | F | A | T | T | I | P | P | P | K | T | L | C | P | D | V | S | T | T | L | A |   |   |   |   |   |   |   |   |
| 12. P.faciiparum  | D | T  | Q  | Q  | A  | N | D | G | A | G | P | V | A | S | C | F | T | T | R | M | S | P | P | Q | Q | I | C | N | S | V | N | T | A | L | S |   |   |   |   |   |   |   |
| 13. P.reichenowi  | D | T  | Q  | Q  | A  | N | D | G | T | G | P | V | A | S | C | F | T | T | R | M | S | P | P | Q | Q | I | C | N | S | V | N | T | A | L | S |   |   |   |   |   |   |   |
| 14. B.bovis       | D | A  | Q  | H  | A  | A | D | V | G | V | G | P | A | E | S | C | F | - | M | V | K | P | P | A | L | H | C | V | L | K | P | V | E | T | L | M | K |   |   |   |   |   |
| 15. T.gondii      | Q | V  | Q  | N  | Q  | S | S | L | A | P | - | E | S | G | C | - | - | - | - | - | - | - | - | - | - | P | P | M | G | I | C | M | D | G | T | I | G | D | P | L | A | S |

## Ron2 peptide amino acid sequence identity matrix

|               | P.ovale | P.vivax | P.malariae | P.coatneyi | P.cynomogi | P.knowlesi | P.berghei | P.chabaudi | P.yoelii | P.gallinaceum | P.relictum | P.faciiparum | P.reichenowi | B.bovis | T.gondii |
|---------------|---------|---------|------------|------------|------------|------------|-----------|------------|----------|---------------|------------|--------------|--------------|---------|----------|
| P.ovale       |         | 92.308% | 87.179%    | 89.744%    | 89.744%    | 84.615%    | 76.923%   | 74.359%    | 74.359%  | 71.795%       | 53.846%    | 48.718%      | 48.718%      | 41.026% | 15.385%  |
| P.vivax       | 92.308% |         | 92.308%    | 94.872%    | 94.872%    | 89.744%    | 79.487%   | 76.923%    | 76.923%  | 76.923%       | 56.410%    | 46.154%      | 46.154%      | 41.026% | 15.385%  |
| P.malariae    | 87.179% | 92.308% |            | 92.308%    | 92.308%    | 87.179%    | 79.487%   | 76.923%    | 76.923%  | 74.359%       | 53.846%    | 51.282%      | 51.282%      | 43.590% | 15.385%  |
| P.coatneyi    | 89.744% | 94.872% | 92.308%    |            | 100%       | 94.872%    | 82.051%   | 79.487%    | 79.487%  | 76.923%       | 56.410%    | 51.282%      | 51.282%      | 38.462% | 15.385%  |
| P.cynomogi    | 89.744% | 94.872% | 92.308%    | 100%       |            | 94.872%    | 82.051%   | 79.487%    | 79.487%  | 76.923%       | 56.410%    | 51.282%      | 51.282%      | 38.462% | 15.385%  |
| P.knowlesi    | 84.615% | 89.744% | 87.179%    | 94.872%    | 94.872%    |            | 76.923%   | 76.923%    | 76.923%  | 76.923%       | 56.410%    | 51.282%      | 51.282%      | 38.462% | 17.949%  |
| P.berghei     | 76.923% | 79.487% | 79.487%    | 82.051%    | 82.051%    | 76.923%    |           | 97.436%    | 94.872%  | 69.231%       | 51.282%    | 48.718%      | 48.718%      | 41.026% | 20.513%  |
| P.chabaudi    | 74.359% | 76.923% | 76.923%    | 79.487%    | 79.487%    | 76.923%    | 97.436%   |            | 92.308%  | 69.231%       | 51.282%    | 51.282%      | 51.282%      | 41.026% | 20.513%  |
| P.yoelii      | 74.359% | 76.923% | 76.923%    | 79.487%    | 79.487%    | 76.923%    | 94.872%   | 92.308%    |          | 71.795%       | 53.846%    | 51.282%      | 51.282%      | 41.026% | 20.513%  |
| P.gallinaceum | 71.795% | 76.923% | 74.359%    | 76.923%    | 76.923%    | 76.923%    | 69.231%   | 69.231%    | 71.795%  |               | 56.410%    | 61.538%      | 61.538%      | 43.590% | 17.949%  |
| P.relictum    | 53.846% | 56.410% | 53.846%    | 56.410%    | 56.410%    | 56.410%    | 51.282%   | 51.282%    | 53.846%  | 56.410%       |            | 46.154%      | 46.154%      | 46.154% | 20.513%  |
| P.faciiparum  | 48.718% | 46.154% | 51.282%    | 51.282%    | 51.282%    | 51.282%    | 48.718%   | 51.282%    | 51.282%  | 61.538%       | 46.154%    |              | 97.436%      | 41.026% | 17.949%  |
| P.reichenowi  | 48.718% | 46.154% | 51.282%    | 51.282%    | 51.282%    | 51.282%    | 48.718%   | 51.282%    | 51.282%  | 61.538%       | 46.154%    | 97.436%      |              | 41.026% | 17.949%  |
| B.bovis       | 41.026% | 41.026% | 43.590%    | 38.462%    | 38.462%    | 38.462%    | 41.026%   | 41.026%    | 41.026%  | 43.590%       | 46.154%    | 41.026%      | 41.026%      |         | 15.789%  |
| T.gondii      | 15.385% | 15.385% | 15.385%    | 15.385%    | 15.385%    | 17.949%    | 20.513%   | 20.513%    | 20.513%  | 17.949%       | 20.513%    | 17.949%      | 17.949%      | 15.789% |          |

## Ron2 peptide amino acid sequence difference matrix

|               | P.ovale | P.vivax | P.malariae | P.coatneyi | P.cynomogi | P.knowlesi | P.berghei | P.chabaudi | P.yoelii | P.gallinaceum | P.relictum | P.faciiparum | P.reichenowi | B.bovis | T.gondii |
|---------------|---------|---------|------------|------------|------------|------------|-----------|------------|----------|---------------|------------|--------------|--------------|---------|----------|
| P.ovale       |         | 3       | 5          | 4          | 4          | 6          | 9         | 10         | 10       | 11            | 18         | 20           | 20           | 23      | 33       |
| P.vivax       | 3       |         | 3          | 2          | 2          | 4          | 8         | 9          | 9        | 9             | 17         | 21           | 21           | 23      | 33       |
| P.malariae    | 5       | 3       |            | 3          | 3          | 5          | 8         | 9          | 9        | 10            | 18         | 19           | 19           | 22      | 33       |
| P.coatneyi    | 4       | 2       | 3          |            | 0          | 2          | 7         | 8          | 8        | 9             | 17         | 19           | 19           | 24      | 33       |
| P.cynomogi    | 4       | 2       | 3          | 0          |            | 2          | 7         | 8          | 8        | 9             | 17         | 19           | 19           | 24      | 33       |
| P.knowlesi    | 6       | 4       | 5          | 2          | 2          |            | 9         | 9          | 9        | 9             | 17         | 19           | 19           | 24      | 32       |
| P.berghei     | 9       | 8       | 8          | 7          | 7          | 9          |           | 1          | 2        | 12            | 19         | 20           | 20           | 23      | 31       |
| P.chabaudi    | 10      | 9       | 9          | 8          | 8          | 9          | 1         |            | 3        | 12            | 19         | 19           | 19           | 23      | 31       |
| P.yoelii      | 10      | 9       | 9          | 8          | 8          | 9          | 2         | 3          |          | 11            | 18         | 19           | 19           | 23      | 31       |
| P.gallinaceum | 11      | 9       | 10         | 9          | 9          | 9          | 12        | 12         | 11       |               | 17         | 15           | 15           | 22      | 32       |
| P.relictum    | 18      | 17      | 18         | 17         | 17         | 17         | 19        | 19         | 18       | 17            |            | 21           | 21           | 21      | 31       |
| P.faciiparum  | 20      | 21      | 19         | 19         | 19         | 19         | 20        | 19         | 19       | 15            | 21         |              | 1            | 23      | 32       |
| P.reichenowi  | 20      | 21      | 19         | 19         | 19         | 19         | 20        | 19         | 19       | 15            | 21         | 1            |              | 23      | 32       |
| B.bovis       | 23      | 23      | 22         | 24         | 24         | 24         | 23        | 23         | 23       | 22            | 21         | 23           | 23           |         | 32       |
| T.gondii      | 33      | 33      | 33         | 33         | 33         | 32         | 31        | 31         | 31       | 32            | 31         | 32           | 32           | 32      |          |

**Figure S2:** Ron2 peptide amino acid sequence alignments, identity matrix and amino acid difference matrix.

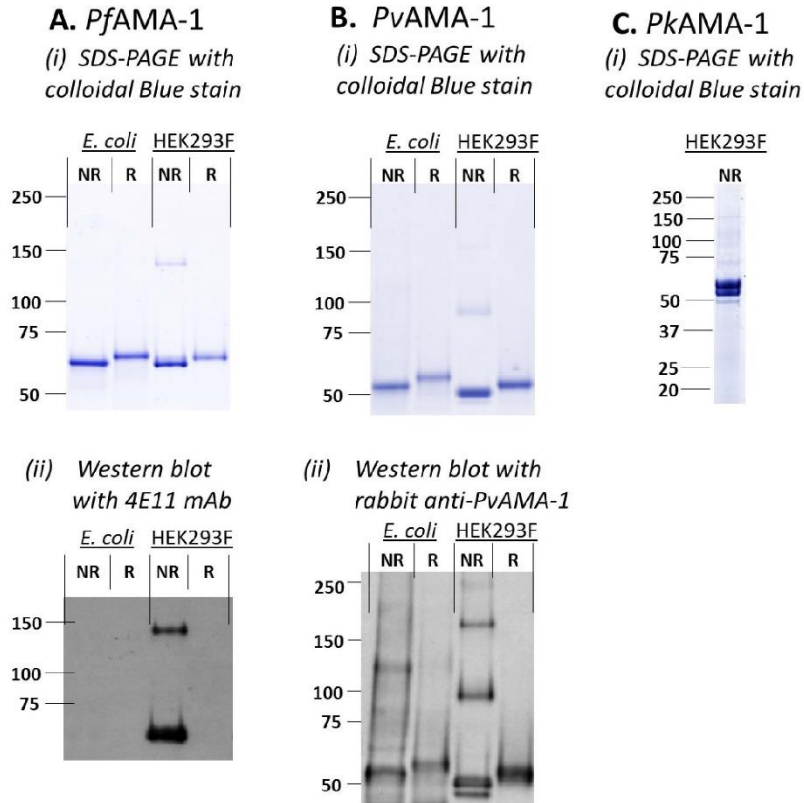

**Figure S3.** (A) *Pf*AMA-1, (B) *Pv*AMA-1 and (C) *Pk*AMA-1 protein. The purified recombinant proteins (1 µg) were run on an SDS-PAGE gel and then tested for protein presence using a (i) protein gel (stained with colloidal blue) or antibody recognition by (ii) western blot. (A-i) *Pf*AMA-1, and (B-i) *Pv*AMA-1 were tested as reduced (TCEP) and non-reduced and compared to *E. coli* expressed protein. (A-ii) *Pf*AMA1 was also tested for binding of the 4E11 mAb and (B-ii) polyclonal rabbit antibodies. (C) *Pk*AMA-1 was tested as a non-reduced protein.

# AMA1 Loop 1E amino acid sequence alignment: extracted from *P.falciparum* AMA1 homologues

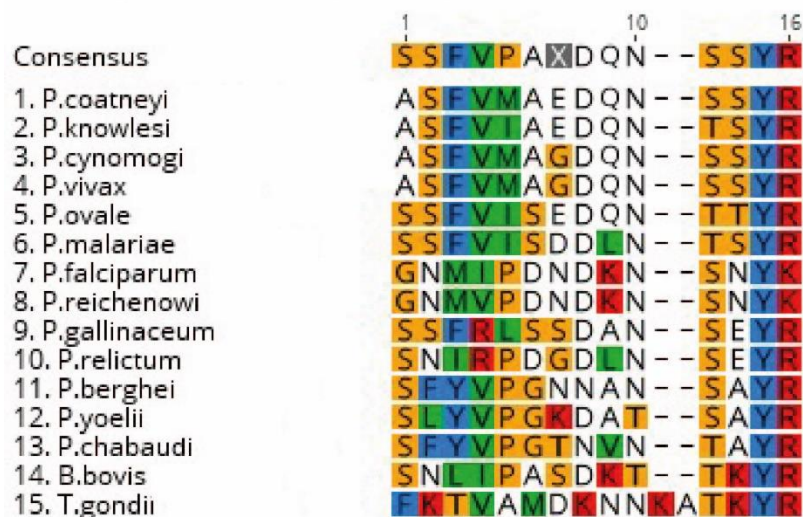

## AMA1 Loop 1E amino acid sequence identity matrix

|                      | <i>P.coatneyi</i> ... | <i>P.knowlesi</i> ... | <i>P.cynomogi</i> ... | <i>P.vivax</i> ext... | <i>P.ovale</i> e... | <i>P.malariae</i> ... | <i>P.falciparu</i> ... | <i>P.reicheno</i> ... | <i>P.gallinace</i> ... | <i>P.relictum</i> ... | <i>P.berghei</i> ... | <i>P.yoelii</i> ex... | <i>P.chabaud</i> ... | <i>B.bovis</i> ex... | <i>T.gondii</i> e... |
|----------------------|-----------------------|-----------------------|-----------------------|-----------------------|---------------------|-----------------------|------------------------|-----------------------|------------------------|-----------------------|----------------------|-----------------------|----------------------|----------------------|----------------------|
| <i>P.coatneyi</i>    |                       | 85.714%               | 92.857%               | 92.857%               | 64.286%             | 57.143%               | 28.571%                | 35.714%               | 50.000%                | 35.714%               | 35.714%              | 35.714%               | 28.571%              | 28.571%              | 25.000%              |
| <i>P.knowlesi</i>    | 85.714%               |                       | 78.571%               | 78.571%               | 78.571%             | 71.429%               | 21.429%                | 28.571%               | 42.857%                | 28.571%               | 28.571%              | 28.571%               | 35.714%              | 35.714%              | 31.250%              |
| <i>P.cynomogi</i>    | 92.857%               | 78.571%               |                       | 100%                  | 57.143%             | 57.143%               | 28.571%                | 35.714%               | 50.000%                | 42.857%               | 35.714%              | 35.714%               | 28.571%              | 28.571%              | 25.000%              |
| <i>P.vivax</i>       | 92.857%               | 78.571%               | 100%                  |                       | 57.143%             | 57.143%               | 28.571%                | 35.714%               | 50.000%                | 42.857%               | 35.714%              | 35.714%               | 28.571%              | 28.571%              | 25.000%              |
| <i>P.ovale</i>       | 64.286%               | 78.571%               | 57.143%               | 57.143%               |                     | 78.571%               | 21.429%                | 28.571%               | 57.143%                | 35.714%               | 35.714%              | 35.714%               | 42.857%              | 35.714%              | 31.250%              |
| <i>P.malariae</i>    | 57.143%               | 71.429%               | 57.143%               | 57.143%               | 78.571%             |                       | 21.429%                | 28.571%               | 57.143%                | 42.857%               | 35.714%              | 35.714%               | 42.857%              | 35.714%              | 37.500%              |
| <i>P.falciparum</i>  | 28.571%               | 21.429%               | 28.571%               | 28.571%               | 21.429%             | 21.429%               |                        | 92.857%               | 28.571%                | 50.000%               | 35.714%              | 28.571%               | 21.429%              | 42.857%              | 12.500%              |
| <i>P.reichenowi</i>  | 35.714%               | 28.571%               | 35.714%               | 35.714%               | 28.571%             | 28.571%               | 92.857%                |                       | 28.571%                | 50.000%               | 42.857%              | 35.714%               | 28.571%              | 35.714%              | 18.750%              |
| <i>P.gallinaceum</i> | 50.000%               | 42.857%               | 50.000%               | 50.000%               | 57.143%             | 57.143%               | 28.571%                | 28.571%               |                        | 57.143%               | 42.857%              | 42.857%               | 28.571%              | 35.714%              | 18.750%              |
| <i>P.relictum</i>    | 35.714%               | 28.571%               | 42.857%               | 42.857%               | 35.714%             | 42.857%               | 50.000%                | 50.000%               | 57.143%                |                       | 42.857%              | 42.857%               | 35.714%              | 42.857%              | 18.750%              |
| <i>P.berghei</i>     | 35.714%               | 28.571%               | 35.714%               | 35.714%               | 35.714%             | 35.714%               | 35.714%                | 42.857%               | 42.857%                | 42.857%               |                      | 71.429%               | 78.571%              | 28.571%              | 25.000%              |
| <i>P.yoelii</i>      | 35.714%               | 28.571%               | 35.714%               | 35.714%               | 35.714%             | 35.714%               | 28.571%                | 35.714%               | 42.857%                | 42.857%               | 71.429%              |                       | 57.143%              | 42.857%              | 18.750%              |
| <i>P.chabaudi</i>    | 28.571%               | 35.714%               | 28.571%               | 28.571%               | 42.857%             | 42.857%               | 21.429%                | 28.571%               | 28.571%                | 35.714%               | 78.571%              | 57.143%               |                      | 35.714%              | 31.250%              |
| <i>B.bovis</i>       | 28.571%               | 35.714%               | 28.571%               | 28.571%               | 35.714%             | 35.714%               | 42.857%                | 35.714%               | 35.714%                | 42.857%               | 28.571%              | 42.857%               | 35.714%              |                      | 25.000%              |
| <i>T.gondii</i>      | 25.000%               | 31.250%               | 25.000%               | 25.000%               | 31.250%             | 37.500%               | 12.500%                | 18.750%               | 18.750%                | 18.750%               | 25.000%              | 18.750%               | 31.250%              | 25.000%              |                      |

## AMA1 Loop 1E amino acid sequence difference matrix

|                      | <i>P.coatneyi</i> ... | <i>P.knowlesi</i> ... | <i>P.cynomogi</i> ... | <i>P.vivax</i> ext... | <i>P.ovale</i> e... | <i>P.malariae</i> ... | <i>P.falciparu</i> ... | <i>P.reicheno</i> ... | <i>P.gallinace</i> ... | <i>P.relictum</i> ... | <i>P.berghei</i> ... | <i>P.yoelii</i> ex... | <i>P.chabaud</i> ... | <i>B.bovis</i> ex... | <i>T.gondii</i> e... |
|----------------------|-----------------------|-----------------------|-----------------------|-----------------------|---------------------|-----------------------|------------------------|-----------------------|------------------------|-----------------------|----------------------|-----------------------|----------------------|----------------------|----------------------|
| <i>P.coatneyi</i>    |                       | 2                     | 1                     | 1                     | 5                   | 6                     | 10                     | 9                     | 7                      | 9                     | 9                    | 9                     | 10                   | 10                   | 12                   |
| <i>P.knowlesi</i>    | 2                     |                       | 3                     | 3                     | 3                   | 4                     | 11                     | 10                    | 8                      | 10                    | 10                   | 10                    | 9                    | 9                    | 11                   |
| <i>P.cynomogi</i>    | 1                     | 3                     |                       | 0                     | 6                   | 6                     | 10                     | 9                     | 7                      | 8                     | 9                    | 9                     | 10                   | 10                   | 12                   |
| <i>P.vivax</i>       | 1                     | 3                     | 0                     |                       | 6                   | 6                     | 10                     | 9                     | 7                      | 8                     | 9                    | 9                     | 10                   | 10                   | 12                   |
| <i>P.ovale</i>       | 5                     | 3                     | 6                     | 6                     |                     | 3                     | 11                     | 10                    | 6                      | 9                     | 9                    | 9                     | 8                    | 9                    | 11                   |
| <i>P.malariae</i>    | 6                     | 4                     | 6                     | 6                     | 3                   |                       | 11                     | 10                    | 6                      | 8                     | 9                    | 9                     | 8                    | 9                    | 10                   |
| <i>P.falciparum</i>  | 10                    | 11                    | 10                    | 10                    | 11                  | 11                    |                        | 1                     | 10                     | 7                     | 9                    | 10                    | 11                   | 8                    | 14                   |
| <i>P.reichenowi</i>  | 9                     | 10                    | 9                     | 9                     | 10                  | 10                    | 1                      |                       | 10                     | 7                     | 8                    | 9                     | 10                   | 9                    | 13                   |
| <i>P.gallinaceum</i> | 7                     | 8                     | 7                     | 7                     | 6                   | 6                     | 10                     | 10                    |                        | 6                     | 8                    | 8                     | 10                   | 9                    | 13                   |
| <i>P.relictum</i>    | 9                     | 10                    | 8                     | 8                     | 9                   | 8                     | 7                      | 7                     | 6                      |                       | 8                    | 8                     | 9                    | 8                    | 13                   |
| <i>P.berghei</i>     | 9                     | 10                    | 9                     | 9                     | 9                   | 9                     | 9                      | 8                     | 8                      | 8                     |                      | 4                     | 3                    | 10                   | 12                   |
| <i>P.yoelii</i>      | 9                     | 10                    | 9                     | 9                     | 9                   | 9                     | 10                     | 9                     | 8                      | 8                     | 4                    |                       | 6                    | 8                    | 13                   |
| <i>P.chabaudi</i>    | 10                    | 9                     | 10                    | 10                    | 8                   | 8                     | 11                     | 10                    | 10                     | 9                     | 3                    | 6                     |                      | 9                    | 11                   |
| <i>B.bovis</i>       | 10                    | 9                     | 10                    | 10                    | 9                   | 9                     | 8                      | 9                     | 9                      | 8                     | 10                   | 8                     | 9                    |                      | 12                   |
| <i>T.gondii</i>      | 12                    | 11                    | 12                    | 12                    | 11                  | 10                    | 14                     | 13                    | 13                     | 13                    | 12                   | 13                    | 11                   | 12                   |                      |

**Figure S4:** AMA1 Loop1E amino acid sequence alignments, identity matrix and amino acid difference matrix.

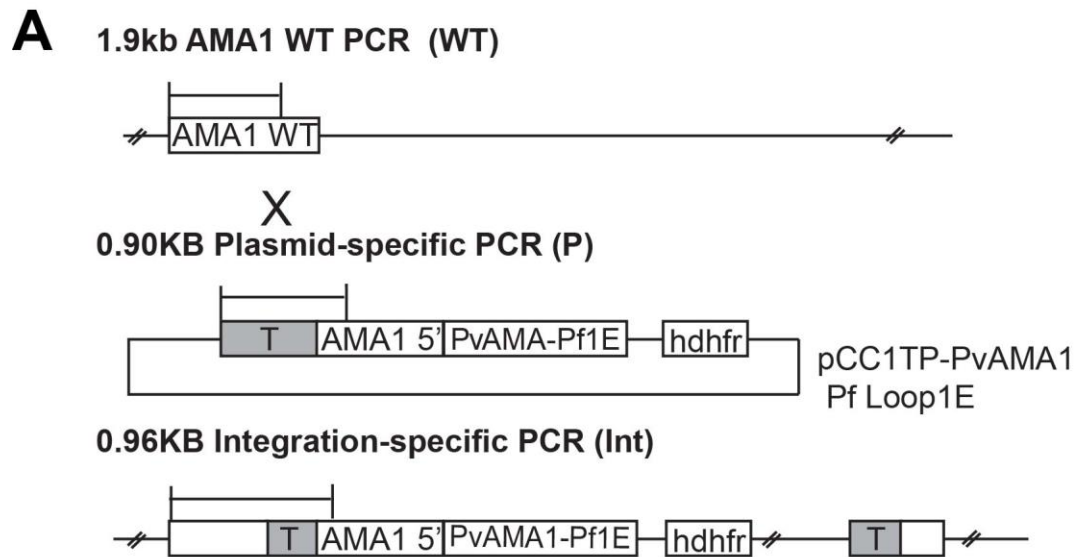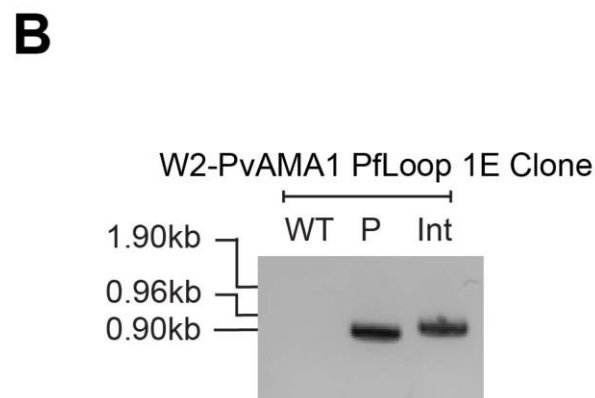

**Figure S5:** Generation of transgenic *P. falciparum* that express chimeric PvAMA1 incorporating *P. falciparum* Loop1E amino acids. **A.** Plasmid design and integration. A codon optimised PvAMA1 gene incorporating *P. falciparum* 3D7 PfAMA1 Loop 1E amino acid substitutions at positions 222-228 was transfected into W2Mef parental parasites. The single-crossover event for allelic replacement of the wild type (WT) AMA1 is illustrated. **B.** PCR confirmation of allelic exchange of the PvAMA1 PfLoop1E gene into the WT AMA1 locus. The regions amplified by PCR are indicated by horizontal lines above the DNA schematics in (A). The expected sizes for wild type (WT), non-integrated plasmid (P) and integrated 3D7 AMA1 (Int) are shown in kilobases (kb). Transgenic parasites were screened for the presence of the wild-type locus, transfection plasmid, and integrated plasmid. The first lane shows an absence of the wild-type locus (WT, expected size 1.90 kb). The second lane shows the presence of the transfection plasmid (P, expected size 0.90 kb), which has integrated into the parasites' genome (third lane, Int, expected size 0.96 kb).

**A****1.9kb AMA1 WT PCR (WT)**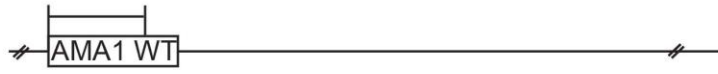**X****0.90KB Plasmid-specific PCR (P)**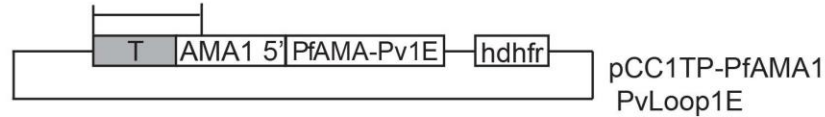**0.96KB Integration-specific PCR (Int)**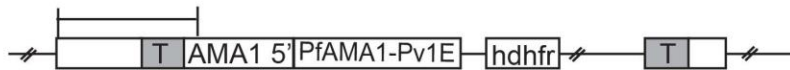**B**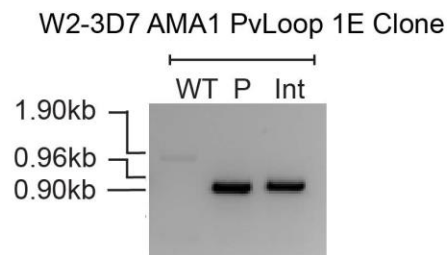

**Figure S6:** Generation of transgenic *P. falciparum* that expresses chimeric 3D7 AMA1 incorporating *P. vivax* Loop1E amino acids. **A.** Plasmid design and integration. A codon optimised 3D7 PfAMA1 gene incorporating *P. vivax* AMA1 Loop 1E amino acid substitutions at positions 222-228 was transfected into W2Mef parental parasites. The single-crossover event for allelic replacement of the wild type (WT) AMA1 is illustrated. **B.** PCR confirmation of allelic exchange of the PfAMA1 PvLoop1E gene into the WT AMA1 locus (W2-3D7 AMA1 PvLoop1E Clone). The regions amplified by PCR are indicated by horizontal lines above the DNA schematics in (A). The expected sizes for wild type (WT), non-integrated plasmid (P) and integrated 3D7 PfAMA1 (Int) are shown in kilobases (kb). Transgenic parasites were screened for the presence of the wild-type locus, transfection plasmid, and integrated plasmid. The first lane shows lack of detection of the wild-type locus (WT, expected size 1.90 kb). The second lane shows the presence of the transfection plasmid (P, expected size 0.90 kb), which has integrated into the parasite genome (third lane, Int, expected size 0.96 kb).

[illegible]

7

| Table 1. Details of the sequences used to make the recombinant AMA-1 |                      |           |                              |              |             |                                         |
|----------------------------------------------------------------------|----------------------|-----------|------------------------------|--------------|-------------|-----------------------------------------|
| Antigen                                                              | Species              | Strain    | Accession no.                | Expressed aa | Length (aa) | Modified to remove glycosylation motif? |
| AMA-1                                                                | <i>P. falciparum</i> | 3D7       | XP_001348015.1<br>PF11_0344  | Q25-K546     | 522         | Yes, Table 2                            |
|                                                                      | <i>P. vivax</i>      | Palo Alto | ACB42433.1<br>EU395595.1     | G22-Q484     | 463         | Yes, Table 2                            |
|                                                                      | <i>P. knowlesi</i>   | H         | XP_002259339.1<br>PKH_093110 | E22-K484     | 463         | Yes, Table 2                            |

| Table 2. Modifications to the AMA-1 protein sequence to remove potential glycosylation sites. |                           |             |                                                       |                       |
|-----------------------------------------------------------------------------------------------|---------------------------|-------------|-------------------------------------------------------|-----------------------|
|                                                                                               | Potential N-glycosylation |             | Modifications to remove potential glycosylation sites |                       |
|                                                                                               | Amino acid no.            | Amino acids | Modified amino acids                                  | Modified seq.         |
| <i>Pf</i><br>AMA-1                                                                            | 162                       | NTT         | 162 N-K                                               | <u>K</u> TT           |
|                                                                                               | 286                       | NYT         | 288 T-V                                               | NY <u>V</u>           |
|                                                                                               | 371                       | NAS         | 373 S-D                                               | NAD <u> </u>          |
|                                                                                               | 421                       | NNSS        | 422 N-S                                               | N <u>S</u> K <u>S</u> |
|                                                                                               | 422                       |             | 423 S-K                                               |                       |
|                                                                                               | 499                       | NST         | 499 N-E                                               | <u>E</u> ST           |
| <i>Pv</i><br>AMA-1                                                                            | 176                       | NSS         | 178 S-N                                               | NS <u>N</u>           |
|                                                                                               | 226                       | NES         | 226 N-D                                               | <u>D</u> ES           |
|                                                                                               | 441                       | NST         | 441 N-Q                                               | <u>Q</u> ST           |
| <i>Pk</i><br>AMA-1                                                                            | 36                        | NAS         | 38 S-L                                                | NA <u>L</u>           |
|                                                                                               | 107                       | NVS         | 107 N-A                                               | <u>A</u> VS           |
|                                                                                               | 176                       | NTS         | 177 T-S                                               | N <u>S</u> S          |
|                                                                                               | 189                       | NKT         | 189 N-E                                               | <u>E</u> KT           |
|                                                                                               | 238                       | NVS         | 239 V-S                                               | N <u>S</u> R          |
|                                                                                               |                           |             | 240 S-R                                               |                       |
|                                                                                               | 441                       | NST         | 441 N-Q                                               | <u>Q</u> ST           |
